# Supplementary material for: Comparison of Magnetic Auriculotherapy, Laser Auriculotherapy and Their Combination for Treatment of Insomnia in the Elderly: A Double-Blinded Randomised Trial
Source: Evid Based Complement Alternat Med. 2019 May 21;2019:3651268. doi: 10.1155/2019/3651268 (PMC6556291; doi:10.1155/2019/3651268)
Supplement: Supplementary Materials — Figure S1: wake after sleep onset (minutes) across time. Figure S2: sleep efficiency (%) across time. Figure S3: SF-12 (physical component) across time. Figure S4: SF-12 (mental component) across time. [file 3651268.f1.xlsx]

## Sheet: WASO
WASO (Minutes)
	Group 1		Group 2		Group 3
	Mean	SE	Mean	SE	Mean	SE
Baseline	92.32	12.83	90.51	14.64	88.33	10.31
Post intervention	69.44	10.41	71.6	9.49	65.84	8.86
6 weeks follow up	51.45	5.1	61.4	8.6	62.34	7.07
3 months follow up	50.82	9.13	74.74	20.96	63.9	12
6 months follow up	48.81	9.66	80.87	26.46	61.59	11.04

## Sheet: Sleep efficiency
Sleep Efficiency (%)
	Group 1		Group 2		Group 3
	Mean	SE	Mean	SE	Mean	SE
Baseline	77.34	2.23	74.06	2.38	70.7	2.23
Post intervention	78.28	1.9	76.94	1.93	78.86	1.64
6 weeks follow up	77.57	1.8	76.14	2.49	74.57	2.21
3 months follow up	81.37	1.98	78.02	3.56	78.82	2.34
6 months follow up	76.02	4.84	77.37	4.64	80.19	2.2

## Sheet: SF-12 (physical)
SF-12 (Physical component)
	Group 1		Group 2		Group 3
	Mean	SE	Mean	SE	Mean	SE
Baseline	40.87	1.09	41.84	1.37	41.64	1.19
Post intervention	44.46	1.23	43.12	1.38	42.96	1.22
6 weeks follow up	45.04	1.34	42.58	1.44	40.33	1.51
3 months follow up	45.55	1.34	46.21	1.42	41.3	1.66
6 months follow up	46.26	1.36	45.96	1.41	41.99	2.29

## Sheet: SF-12 (mental)
SF-12 (Mental component)
	Group 1		Group 2		Group 3
	Mean	SE	Mean	SE	Mean	SE
Baseline	47.99	1.63	45.77	1.95	46.05	1.63
Post intervention	51.84	1.64	47.35	1.78	50.58	1.37
6 weeks follow up	50.97	1.61	50.89	1.84	53.15	1.65
3 months follow up	48.05	2.31	51.31	2.27	50.55	1.76
6 months follow up	51.64	2	52.24	2.05	51.05	2.2
